# Supplementary material
Source: publisher figshare collection journal article supplement (https://gsapubs.figshare.com/ndownloader/files/29062254)
Supplement: Supplementary file 1 [file 29062254]

## Sheet: Sheet1
Table S2. SHRIMP U-Pb zircon data for Federal 2-26 granitic rocks
	ppm	ppm	238U/		207Pb/		206Pb*/238U		207Pb*/206Pb*
	U	Th	206Pb	err	206Pb	err	Age	err	Age	err
13/3 3357.2*
CJ133-1.1	209.768	599.277	83.302	1.50917	0.0499302	5.68001	76.6953	1.18495
CJ133-2.1	267.935	215.355	82.3533	1.31076	0.0500999	4.83073	77.5587	1.03975
CJ133-3.1	173.423	82.7797	69.4844	1.54377	0.0517249	5.4991	91.6668	1.44621
CJ133-4.1	141.736	39.2813	84.0793	1.84956	0.0481391	6.94377	76.1605	1.43906
CJ133-5.1	335.789	330.656	79.8949	1.18704	0.046264	4.53311	80.3214	0.97264
CJ133-6.1	317.502	344.876	80.8974	1.21694	0.0472368	4.56911	79.2334	0.983927
CJ133-7.1	329.093	335.593	80.2966	1.21839	0.0486332	5.01094	79.6839	0.997165
CJ133-8.1	217.342	161.096	79.2884	1.49855	0.0481511	5.60405	80.7418	1.23555
17/9 4433.9
CJ179-1.1	483.24	301.217	79.027	1.00445	0.0472119	5.21639	81.1033	0.849023
CJ179-2.1	215.305	184.783	78.7678	1.46625	0.0445871	5.73566	81.6371	1.22017
CJ179-3.1	105.997	26.0597	84.8747	2.2174	0.0514627	8.26933	75.1343	1.70789
CJ179-4.1	81.6834	35.3295	81.4216	2.40806	0.0459164	9.80726	78.8559	1.94271
CJ179-5.1	614.316	551.907	78.8246	0.854184	0.0471405	3.2171	81.318	0.708749
CJ179-6.1	262.049	264.776	81.5197	1.34499	0.0508832	4.92779	78.2712	1.07727
CJ179-7.1	304.929	331.017	80.894	1.25617	0.0444213	4.93157	79.5168	1.01831
CJ179-8.1	273.734	249.088	79.2	1.35641	0.0487182	5.12055	80.774	1.12003
39/5 7964.5
CJ395-1.1	317.598	69.046	78.4867	1.11769	0.0470289	4.24043	81.678	0.931692
CJ395-2.1	328.88	21.6567	77.554	1.07831	0.0461306	4.10916	82.7492	0.909918
CJ395-3.1	193.679	79.8811	77.9004	1.40812	0.0459416	5.3275	82.4023	1.18263
CJ395-4.1	476.438	280.401	38.9312	0.819908	0.0482814	2.46998	163.707	1.35298
CJ395-5.1	196.615	77.9382	80.5924	1.46247	0.0470013	5.6288	79.5556	1.18835
CJ395-6.1	83.897	112.856	78.2153	2.24299	0.0498536	8.24845	81.6698	1.87238
CJ395-7.1	336.693	122.081	79.3275	1.0996	0.0487505	4.08041	80.6414	0.905737
CJ395-8.1	283.648	172.355	79.7278	1.22259	0.04639	4.63304	80.4763	1.00347
50/2 9904.9
CJ502-1.1	632.212	853.514	80.8741	0.793215	0.0500844	2.92506	78.9729	0.640653
CJ502-2.1	128.744	84.8682	3.47314	0.7836	0.103264	1.01312	1625.87	12.5147	1683.6	18.7019
CJ502-3.1	54.0319	66.6627	78.9494	2.7237	0.0472919	10.4622	81.1745	2.25852
CJ502-4.1	149.142	141.012	80.5985	1.63893	0.050116	5.98966	79.2387	1.32755
CJ502-5.1	48.51	51.9285	75.6685	2.95167	0.054961	10.5137	83.8641	2.53989
CJ502-6.1	395.097	54.421	85.8115	1.08441	0.0466211	4.15344	74.7715	0.82784
CJ502-7.1	37.093	40.9287	74.7264	3.32584	0.0423045	13.7363	86.2776	2.92409
CJ502-8.1	234.402	122.259	3.25022	0.580452	0.100827	0.733581	1738.99	9.95467	1647.67	14.1546
CJ502-9.1	237.865	206.035	79.8165	1.3308	0.0521375	4.79422	79.8081	1.08728
CJ502-10.1	447.827	77.7481	82.4731	0.95695	0.0453612	3.67377	77.9088	0.760117
CJ502-11.1	385.695	55.7822	82.3213	1.06794	0.0471822	4.07109	77.8738	0.849275
Table S2. SHRIMP U-Pb zircon data for Federal 2-26 granitic rocks
	ppm	ppm	238U/		207Pb/		206Pb*/238U		207Pb*/206Pb*
	U	Th	206Pb	err	206Pb	err	Age	err	Age	err
19/4 5430.7
CJ194-1.1	196.092	231.383	42.0406	1.09708	0.051362	3.92361	151.111	1.68845
CJ194-2.1	101.559	112.808	42.2614	1.54388	0.0531332	5.18957	149.995	2.35568
CJ194-3.1	176.483	199.315	41.7105	1.17008	0.0492583	4.0874	152.698	1.81366
CJ194-4.1	148.52	193.312	42.2995	1.27072	0.0518616	4.28399	150.1	1.93811
CJ194-5.1	1097.5	97.537	73.043	0.582184	0.0487691	2.1575	87.546	0.520384
CJ194-6.1	792.218	98.5084	60.5331	0.626869	0.0483437	2.30693	105.596	0.674641
CJ194-7.1	124.81	56.927	42.5011	1.38454	0.0481292	4.85835	150.09	2.10786
CJ194-8.1	742.233	86.5527	75.7468	0.723291	0.0492744	2.69385	84.3812	0.623751
CJ194-9.1	193.042	259.304	41.7455	1.11142	0.0466371	3.98846	153.069	1.72458
CJ194-10.1	183.548	217.756	42.3285	1.14804	0.0475214	4.12828	150.812	1.75697
CJ194-11.1	121.965	142.682	41.863	1.42142	0.0506782	5.18733	151.877	2.19926
26/5 6245.0
CJ265-1	131.615	78.0569	42.3967	1.55553	0.0531713	3.82201	149.513	2.33913
CJ265-2	157.585	167.513	40.3819	1.42969	0.0534992	3.48837	156.849	2.25452
CJ265-3	196.525	198.594	43.2034	1.34307	0.0479201	3.47341	147.707	1.99244
CJ265-4	217.973	250.209	40.8555	1.21956	0.0512405	3.0452	155.483	1.9054
CJ265-5	279.811	338.322	42.6523	0.931546	0.0514953	3.25638	148.936	1.41181
CJ265-6	152.034	161.273	43.1558	1.27705	0.0499478	4.54741	147.496	1.91554
CJ265-7	262.681	310.431	43.0544	1.0033	0.0575167	3.28594	146.444	1.49967
CJ265-8	71.6647	53.3164	40.4935	1.80291	0.0552714	5.95964	156.073	2.86509
CJ265-9	331.191	481.008	41.1599	0.842366	0.0511003	2.89653	154.37	1.32128
CJ265-10	127.928	120.07	40.8595	1.33947	0.053191	4.70793	155.09	2.11752
Notes:
* Location by core interval, with sample depth in feet
** Interpreted crystallization age
